# Supplementary material for: A visual test paper based on Pb(ii) metal–organic nanotubes utilized as a H2S sensor with high selectivity and sensitivity
Source: Royal Society of Chemistry journal article supplement (doi:10.1039/c7ay00627f), 2017-01-01
Supplement: c7ay00627f1.pdf [file c7ay00627f1.pdf]

Electronic Supplementary Information for

**A Visual Test Paper based on Pb(II) Metal-Organic  
Nanotube Utilized as H<sub>2</sub>S Sensor with High Selectivity and  
Sensitivity**

Xuelian Xin, Fangna Dai,\* Fugang Li, Xin Jin, Rongming Wang,\* Daofeng Sun\*

State Key Laboratory of Heavy Oil Processing, College of Science, China University of  
Petroleum (East China), Qingdao, Shandong 266580, China.

Email: dfsun@upc.edu.cn., rmwang@upc.edu.cn, fndai@upc.edu.cn\*

**CONTENTS**

|                                                                                                                                                                              |   |
|------------------------------------------------------------------------------------------------------------------------------------------------------------------------------|---|
| 1. Materials and methods.....                                                                                                                                                | 2 |
| 2. Synthetic strategy.....                                                                                                                                                   | 2 |
| 3. PXRD of <b>CD-MONT-2</b> . ....                                                                                                                                           | 2 |
| 4. PXRD of <b>CD-MONT-2'</b> test papers. ....                                                                                                                               | 3 |
| 5. The decrease of fluorescence intensities with the increasement of Na <sub>2</sub> S.....                                                                                  | 3 |
| 6. Fluorescent spectra of the <b>CD-MONT-2'</b> in H <sub>2</sub> O with different substances. ....                                                                          | 4 |
| 7. The relative fluorescent intensity of I <sub>0</sub> /I at 432 nm with 5 μM of Na <sub>2</sub> S, and 50 μM of inorganic salts, reducing agents, amino acids and ROS..... | 5 |
| 8. The XPS spectra of Pb, C and O of <b>CD-MONT-2'</b> and <b>CD-MONT-2'</b> -derivatives. ....                                                                              | 5 |
| 9. FTIR spectra of beta-CD, <b>CD-MONT-2'</b> and <b>CD-MONT-2'</b> -derivatives. ....                                                                                       | 6 |
| 10. TEM image and SEAD of obtained <b>CD-MONT-2'</b> and <b>CD-MONT-2'</b> -derivatives. ....                                                                                | 6 |

- 1. Materials and methods.** All chemicals and solvents are purchased and used as received without further purification. <sup>t</sup>BuOOH could be used to induce ROS. The H<sub>2</sub>S gas was made by the reaction of FeS and H<sub>2</sub>SO<sub>4</sub> (H<sub>2</sub>SO<sub>4</sub> : H<sub>2</sub>O = 2 : 3 [v/v]) in a flask, and collected in a flask of 150 ml for an hour through a desiccant of P<sub>2</sub>O<sub>5</sub> and waste gas is absorbed by a NaOH solution at the end of equipment.
- 2. Synthetic strategy:** PbCl<sub>2</sub> (0.80 mmol, 0.2250 g) and β-cyclodextrin (β-CD) (0.10 mmol, 0.1150 g) were suspended in 30 mL distilled water, and then stirred at 80 °C for an hour. The mixture is cooled to room temperature and filtered. The obtained solution is transformed to glass vial with a diameter of 1.6 centimeter, and then the vial was cooled to 4 °C to make cyclohexanol become solid state. Subsequently, the triethylamine was layered onto the solid cyclohexanol, and the vial was sealed and heated at 110 °C for 50 hours. After cooling, the colourless rod-like crystals were collected by filtration and washed with water.
- 3. PXRD of CD-MONT-2.**

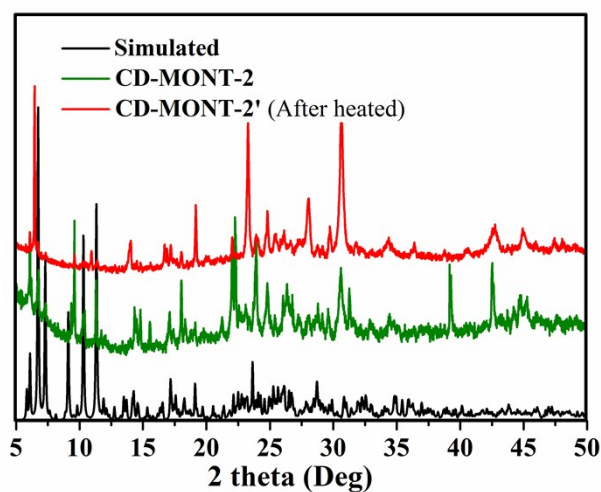

**Fig. S1** PXRD patterns of simulated based on crystal data, as-synthesized and after heated at 120 °C for an hour.

#### 4. PXRD of CD-MONT-2' test papers.

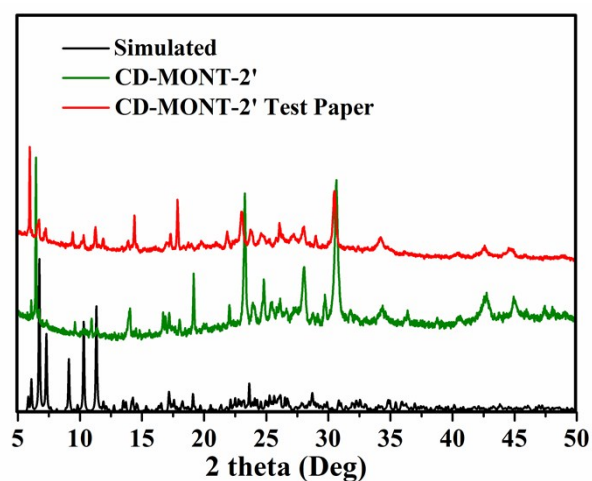

Fig. S2 PXRD patterns of the simulated one from single-crystal data of **CD-MONT-2**, **CD-MONT-2'** and **CD-MONT-2'**-based test papers.

#### 5. The decrease of fluorescence intensities with the increasement of $\text{Na}_2\text{S}$

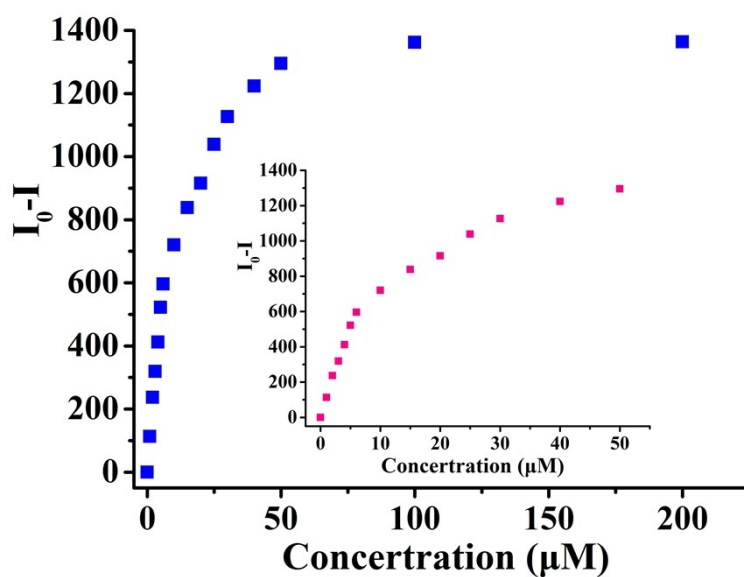

Fig. S3 The decrease of fluorescence intensities with the increasement of  $\text{Na}_2\text{S}$ .

## 6. Fluorescent spectra of the CD-MONT-2' in H<sub>2</sub>O with different substances.

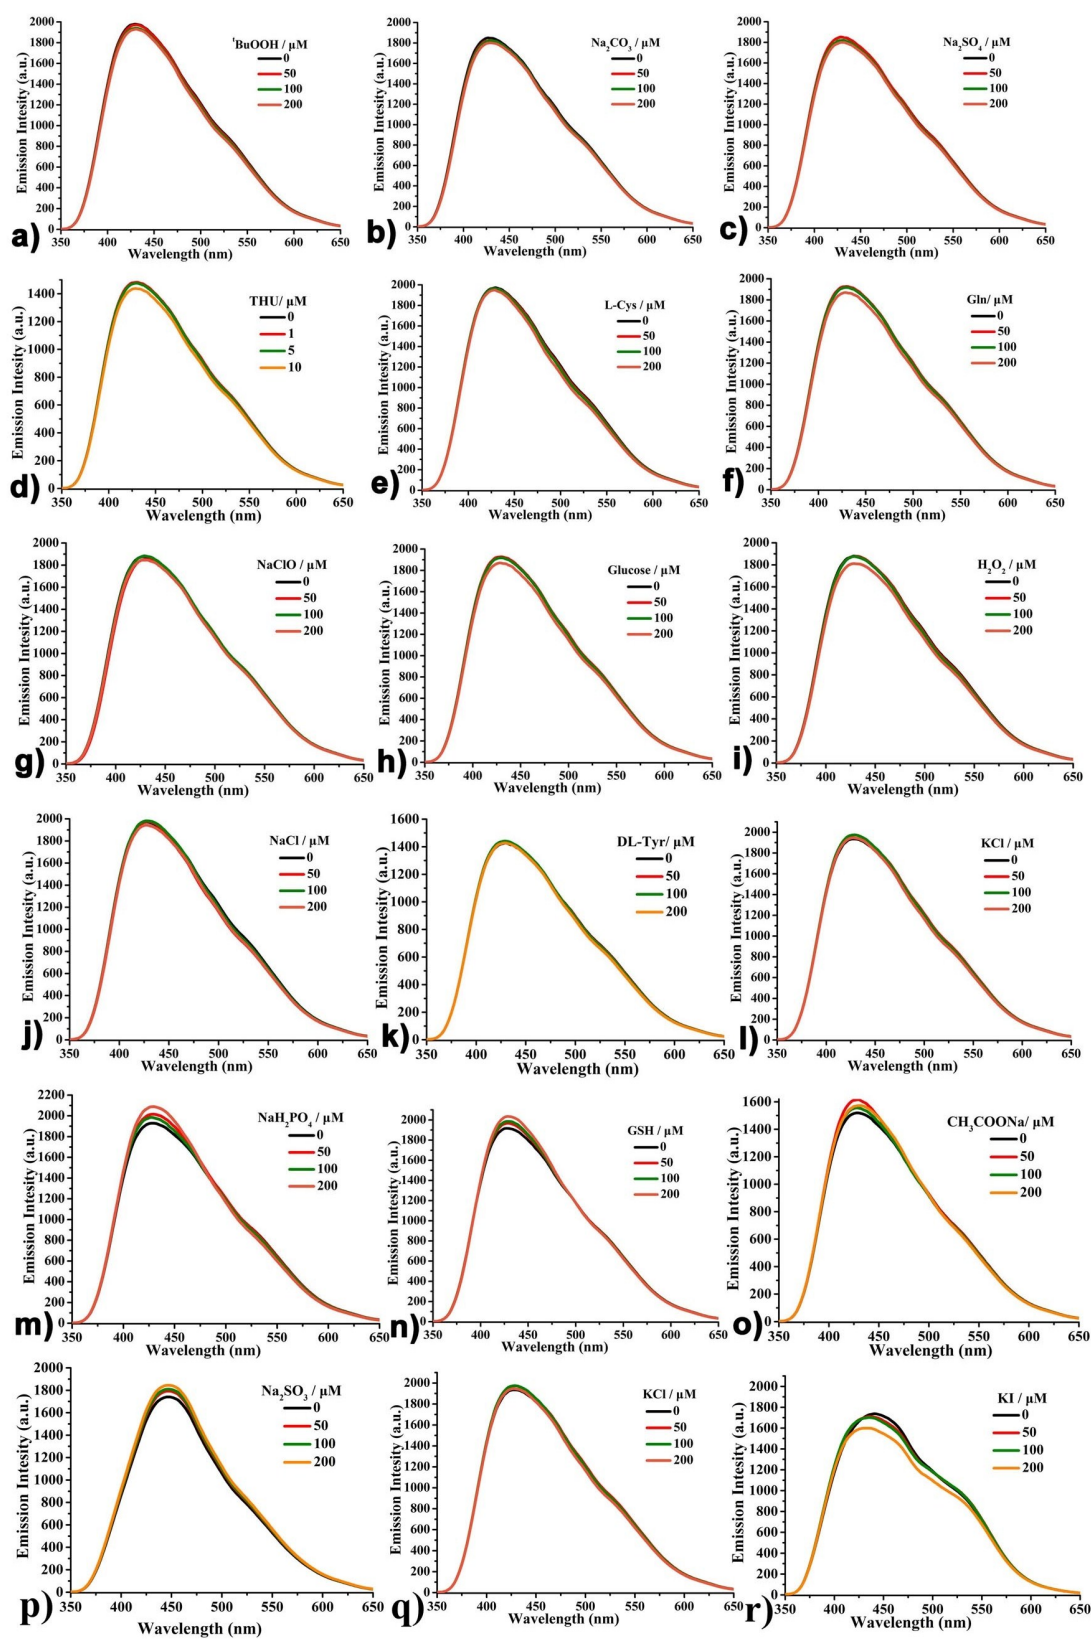

**Fig. S4** Fluorescent spectra of 1 mg/mL CD-MONT-2' in H<sub>2</sub>O treated with: a) <sup>t</sup>BuOOH, b) Na<sub>2</sub>CO<sub>3</sub>, c) Na<sub>2</sub>SO<sub>4</sub>, d) THU, e) L-Cys, f) Gln, g) NaClO, h) Glucose, i) H<sub>2</sub>O<sub>2</sub>, j) NaCl, k) DL-Tyr, l) KCl, m) NaH<sub>2</sub>PO<sub>4</sub>, n) GSH, o) CH<sub>3</sub>COONa, p) Na<sub>2</sub>SO<sub>3</sub>, q) KCl, and r) KI.

7. The relative fluorescent intensity of  $I_0/I$  at 432 nm with 5  $\mu\text{M}$  of  $\text{Na}_2\text{S}$ , and 50  $\mu\text{M}$  of inorganic salts, reducing agents, amino acids and ROS..

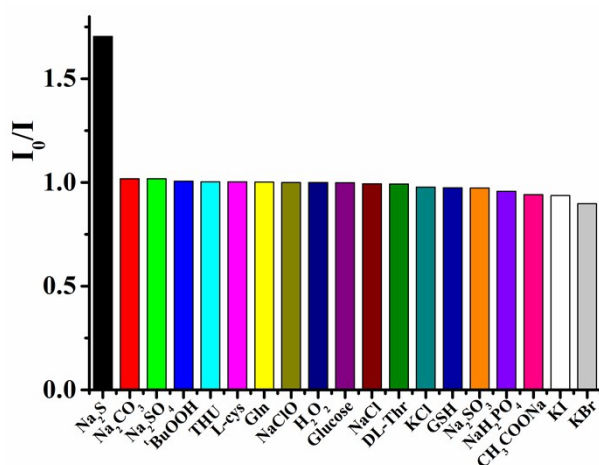

Fig. S5 The relative fluorescent intensity of  $I_0/I$  at 432 nm with 5  $\mu\text{M}$  of  $\text{Na}_2\text{S}$ , and 50  $\mu\text{M}$  of inorganic salts, reducing agents, amino acids and ROS.

8. The XPS spectra of Pb, C and O of CD-MONT-2' and CD-MONT-2'-derivatives.

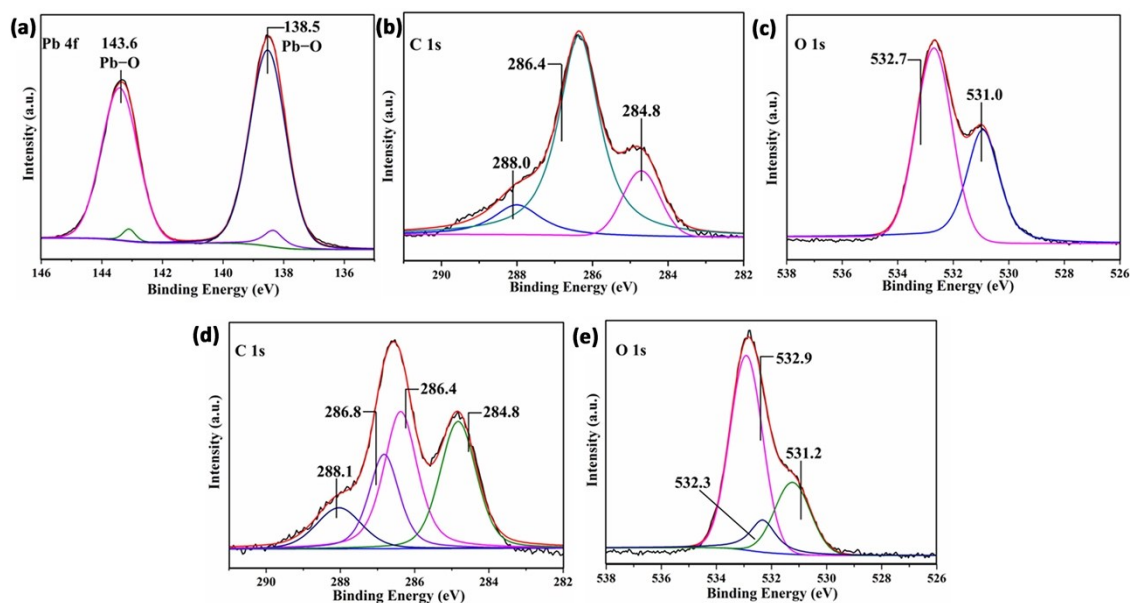

Fig. S6 The XPS spectra of a) Pb 4f, b) C 1s and c) O 1s of CD-MONT-2'; the XPS spectra of d) C 1s and e) O 1s of CD-MONT-2'-derivatives.

9. FTIR spectra of beta-CD, CD-MONT-2' and CD-MONT-2'-derivatives.

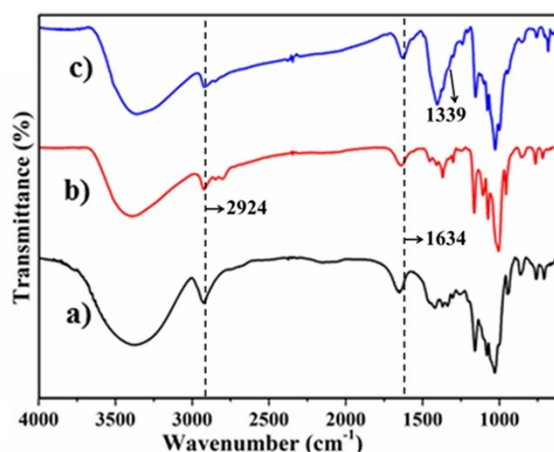

Fig. S7 FTIR spectra of beta-CD a), CD-MONT-2' b) and CD-MONT-2'-derivatives c).

10. TEM image and SEAD of obtained CD-MONT-2' and CD-MONT-2'-derivatives.

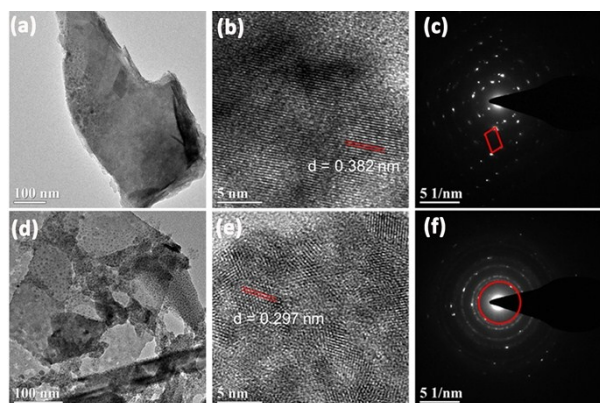

Fig. S8 TEM image and SEAD of obtained CD-MONT-2' (a, b and c) and CD-MONT-2'-derivatives (d, e and f).
